# Supplementary figures and images for: Mpox, Caused by the MPXV of the Clade IIb Lineage, Goes Global
Source: MDPI journal article supplement (doi:10.3390/tropicalmed8020076), 2023-01-20

Tree scale: 0.001

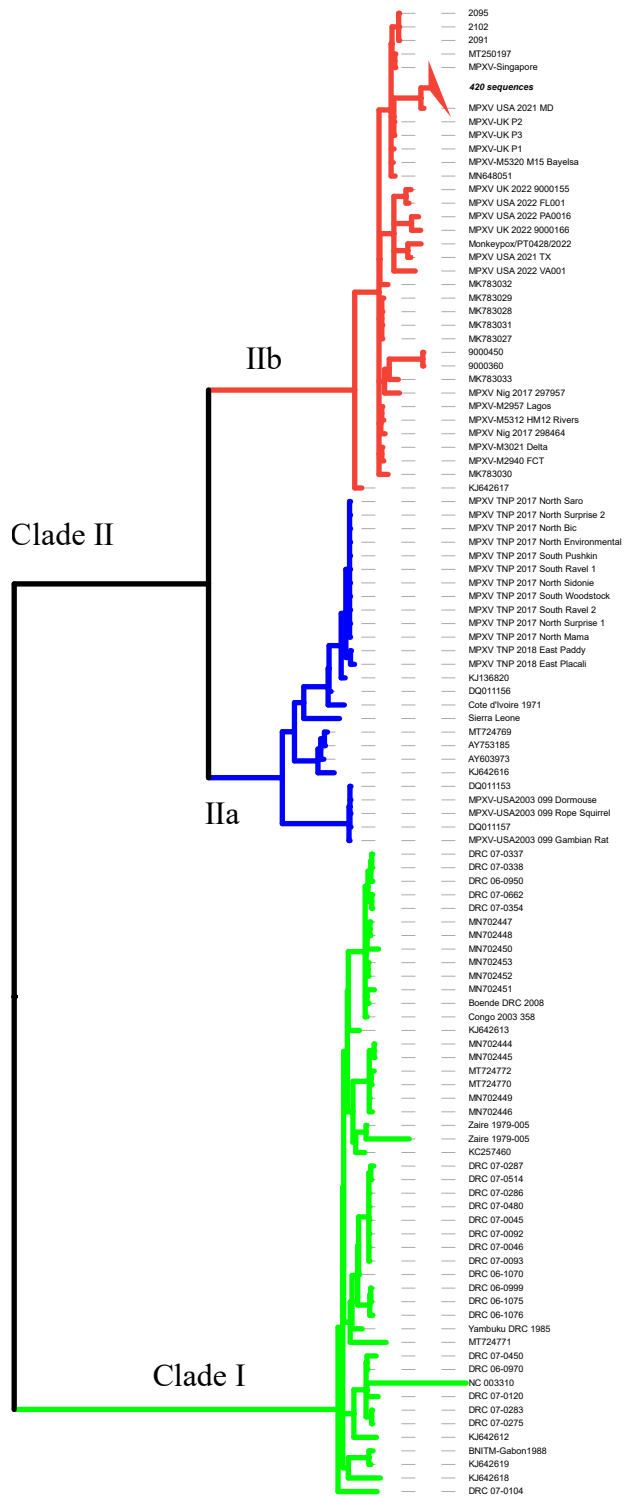

Supplement: s1 [file s1]
